# Supplementary material
Source: PubMed Central journal article supplement (PMC4668777)
Supplement: supp_btv307_supplementary_Appendix_A_C.pdf [file supp_btv307_supplementary_Appendix_A_C.pdf]

## Appendix A: Joint likelihood function

For the  $i$ th individual in a sample of size  $n$ , let  $Y_i$  be the quantitative or binary trait and  $X_i$  the vector of covariates. For the  $k$ th SNP in a genetic region, let  $G_{ik}$  denote the unobserved true genotype,  $p_k$  the MAF and  $D_{ik}$  the observed sequenced data. Let  $f(D_{ik}|G_{ik})$  be the given genotype likelihood function (GLF). We assume

$$f(G_{ik}|p_k) = \binom{2}{G_{ik}} p_k^{G_{ik}} (1-p_k)^{2-G_{ik}}, G_{ik} \in \{0, 1, 2\} \quad (1)$$

For generalized linear model,

$$f(Y_i|X_i, G_{ik}; \alpha_0, \alpha_1, \beta, \phi) = \exp\left(\frac{Y_i \eta_i - b(\eta_i)}{a(\phi)} + c(Y_i, \phi)\right) \quad (2)$$

with  $\eta_i = \eta_{\alpha_0, \alpha_1, \beta}(X_i, G_{ik}) = \alpha_0 + \alpha_1^T X_i + \beta G_{ik}$ . The exact forms of  $a(\cdot)$ ,  $b(\cdot)$  and  $c(\cdot)$  depend on whether  $Y_i$  is quantitative or binary. When  $Y_i$  is quantitative,

$$\phi = \sigma^2, a(\phi) = \phi, b(\eta) = \frac{\eta^2}{2}, c(Y_i, \phi) = -\frac{Y_i^2}{2\phi} - \frac{\log(2\pi\phi)}{2} \quad (3)$$

When  $Y_i$  is binary,

$$a(\phi) = 1, b(\eta) = \log(1 + \exp(\eta)), c(Y_i, \phi) = 0 \quad (4)$$

The joint log-likelihood function of the parameters  $\{\alpha = (\alpha_0, \alpha_1^T)^T, \beta, \phi, p\}$  given the observed data  $\{Y_i, X_i, D_{ik}, i = 1, \dots, n\}$  can be written as:

$$l(\alpha, \beta, \phi, p_k|O) = \sum_{i=1}^n \log \left[ \sum_{G_{ik} \in \{0, 1, 2\}} \{f(Y_i|X_i, G_{ik}; \alpha, \beta, \phi) f(D_{ik}|G_{ik}) f(G_{ik}|p_k)\} \right]. \quad (5)$$

## Appendix B: UNC score test

UNC score test is developed upon the pioneer work of Skotte et al. 2012.

### B.1 score function

We want to test the null hypothesis

$$H_0 : \beta = 0$$

by score test, which is based on the score function

$$\begin{aligned}
S(\alpha, \beta, \phi, p_k) &= \begin{pmatrix} \frac{\partial l(\alpha, \beta, \phi, p_k | O)}{\partial \alpha} \\ \frac{\partial l(\alpha, \beta, \phi, p_k | O)}{\partial \beta} \\ \frac{\partial l(\alpha, \beta, \phi, p_k | O)}{\partial \phi} \\ \frac{\partial l(\alpha, \beta, \phi, p_k | O)}{\partial p_k} \end{pmatrix} \\
&= \sum_{i=1}^n H^{-1}(Y_i, D_{ik} | X_i) \sum_{G_{ik} \in (0,1,2)} \begin{pmatrix} f(Y_i | X_i, G_{ik}) \frac{Y_i - b'(\eta_i)}{a(\phi)} X_i f(D_{ik} | G_{ik}) f(G_{ik} | p_k) \\ f(Y_i | X_i, G_{ik}) \frac{Y_i - b'(\eta_i)}{a(\phi)} G_{ik} f(D_{ik} | G_{ik}) f(G_{ik} | p_k) \\ f(Y_i | X_i, G_{ik}) \left[ -\frac{Y_i \eta_i - b(\eta_i)}{a^2(\phi)} a'(\phi) + c'(\phi) \right] f(D_{ik} | G_{ik}) f(G_{ik} | p_k) \\ f(Y_i | X_i, G_{ik}) f(D_{ik} | G_{ik}) Q(G_{ik}, p_k) \end{pmatrix} \quad (6)
\end{aligned}$$

where  $H(Y_i, D_{ik} | X_i) = \sum_{G_{ik} \in (0,1,2)} \{f(Y_i | X_i, G_{ik}) f(D_{ik} | G_{ik}) f(G_{ik} | p_k)\}$  and

$$Q(G_{ik}, p_k) = \begin{cases} 2(p_k - 1), & G_{ik} = 0 \\ 2 - 4p_k, & G_{ik} = 1 \\ 2p_k, & G_{ik} = 2 \end{cases}.$$

Denote the maximum likelihood estimator under  $H_0 : \beta = 0$  by  $(\tilde{\alpha}, 0, \tilde{\phi}, \tilde{p}_k)$ . If we evaluate the score function by  $(\tilde{\alpha}, 0, \tilde{\phi}, \tilde{p}_k)$ , the score function above simplifies to

$$S(\tilde{\alpha}, 0, \tilde{\phi}, \tilde{p}_k) = \begin{pmatrix} 0 \\ \sum_{i=1}^n \frac{Y_i - b'(\tilde{\alpha}^T X_i)}{a(\tilde{\phi})} E(G_{ik} | D_{ik}) \\ 0 \\ 0 \end{pmatrix} \quad (7)$$

where  $E(G_{ik} | D_{ik}) = \frac{\sum_{G_{ik} \in (0,1,2)} G_{ik} f(D_{ik} | G_{ik}) f(G_{ik} | \tilde{p}_k)}{\sum_{G_{ik} \in (0,1,2)} f(D_{ik} | G_{ik}) f(G_{ik} | \tilde{p}_k)}$  is the posterior expectation of the genotype of the  $k$ th SNP for individual  $i$ .

When  $Y_i$  is quantitative,

$$a'(\phi) = 1, b'(\eta) = \eta, c'(Y_i, \phi) = \frac{Y_i^2}{2\phi^2} - \frac{1}{2\phi} \quad (8)$$

When  $Y_i$  is binary,

$$a'(\phi) = 0, b'(\eta) = \frac{\exp(\eta)}{1 + \exp(\eta)}, c'(Y_i, \phi) = 0 \quad (9)$$

## B.2 Information matrix

The observed information matrix is

$$\begin{aligned}
I(\alpha, \beta, \phi, p_k | O) &= - \begin{bmatrix} \frac{\partial l(\alpha, \beta, \phi, p_k | O)}{\partial \alpha \partial \alpha} & \frac{\partial l(\alpha, \beta, \phi, p_k | O)}{\partial \alpha \partial \beta} & \frac{\partial l(\alpha, \beta, \phi, p_k | O)}{\partial \alpha \partial \phi} & \frac{\partial l(\alpha, \beta, \phi, p_k | O)}{\partial \alpha \partial p_k} \\ \frac{\partial l(\alpha, \beta, \phi, p_k | O)}{\partial \beta \partial \alpha} & \frac{\partial l(\alpha, \beta, \phi, p_k | O)}{\partial \beta \partial \beta} & \frac{\partial l(\alpha, \beta, \phi, p_k | O)}{\partial \beta \partial \phi} & \frac{\partial l(\alpha, \beta, \phi, p_k | O)}{\partial \beta \partial p_k} \\ \frac{\partial l(\alpha, \beta, \phi, p_k | O)}{\partial \phi \partial \alpha} & \frac{\partial l(\alpha, \beta, \phi, p_k | O)}{\partial \phi \partial \beta} & \frac{\partial l(\alpha, \beta, \phi, p_k | O)}{\partial \phi \partial \phi} & \frac{\partial l(\alpha, \beta, \phi, p_k | O)}{\partial \phi \partial p_k} \\ \frac{\partial l(\alpha, \beta, \phi, p_k | O)}{\partial p_k \partial \alpha} & \frac{\partial l(\alpha, \beta, \phi, p_k | O)}{\partial p_k \partial \beta} & \frac{\partial l(\alpha, \beta, \phi, p_k | O)}{\partial p_k \partial \phi} & \frac{\partial l(\alpha, \beta, \phi, p_k | O)}{\partial p_k \partial p_k} \end{bmatrix} \\
&= \begin{bmatrix} I_{\alpha\alpha} & I_{\alpha\beta} & I_{\alpha\phi} & I_{\alpha p_k} \\ I_{\beta\alpha} & I_{\beta\beta} & I_{\beta\phi} & I_{\beta p_k} \\ I_{\phi\alpha} & I_{\phi\beta} & I_{\phi\phi} & I_{\phi p_k} \\ I_{p_k\alpha} & I_{p_k\beta} & I_{p_k\phi} & I_{p_k p_k} \end{bmatrix} \tag{10}
\end{aligned}$$

where

$$\begin{aligned}
I_{\alpha\alpha} &= - \frac{\partial l(\alpha, \beta, \phi, p_k | O)}{\partial \alpha \partial \alpha} \\
&= - \sum_{i=1}^n \left[ -H^{-2}(Y_i, D_{ik} | X_i) \left( \sum_{G_{ik} \in (0,1,2)} f(Y_i | X_i, G_{ik}) \frac{Y_i - b'(\eta_i)}{a(\phi)} X_i f(D_{ik} | G_{ik}) f(G_{ik} | p_k) \right) \right. \\
&\quad \cdot \left( \sum_{G_{ik} \in (0,1,2)} f(Y_i | X_i, G_{ik}) \frac{Y_i - b'(\eta_i)}{a(\phi)} X_i^T f(D_{ik} | G_{ik}) f(G_{ik} | p_k) \right) \\
&\quad \left. + H^{-1}(Y_i, D_{ik} | X_i) \sum_{G_{ik} \in (0,1,2)} f(Y_i | X_i, G_{ik}) \left( \frac{(Y_i - b'(\eta_i))^2}{a^2(\phi)} - \frac{b''(\eta_i)}{a(\phi)} \right) X_i X_i^T f(D_{ik} | G_{ik}) f(G_{ik} | p_k) \right] \tag{11}
\end{aligned}$$

$$\begin{aligned}
I_{\alpha\beta} = I_{\beta\alpha} &= - \frac{\partial l(\alpha, \beta, \phi, p_k | O)}{\partial \alpha \partial \beta} \\
&= - \sum_{i=1}^n \left[ -H^{-2}(Y_i, D_{ik} | X_i) \left( \sum_{G_{ik} \in (0,1,2)} f(Y_i | X_i, G_{ik}) \frac{Y_i - b'(\eta_i)}{a(\phi)} X_i f(D_{ik} | G_{ik}) f(G_{ik} | p_k) \right) \right. \\
&\quad \cdot \left( \sum_{G_{ik} \in (0,1,2)} f(Y_i | X_i, G_{ik}) \frac{Y_i - b'(\eta_i)}{a(\phi)} G_{ik} f(D_{ik} | G_{ik}) f(G_{ik} | p_k) \right) \\
&\quad \left. + H^{-1}(Y_i, D_{ik} | X_i) \sum_{G_{ik} \in (0,1,2)} f(Y_i | X_i, G_{ik}) \left( \frac{(Y_i - b'(\eta_i))^2}{a^2(\phi)} - \frac{b''(\eta_i)}{a(\phi)} \right) X_i G_{ik} f(D_{ik} | G_{ik}) f(G_{ik} | p_k) \right] \tag{12}
\end{aligned}$$

$$\begin{aligned}
I_{\alpha\phi} &= I_{\phi\alpha} = -\frac{\partial l(\alpha, \beta, \phi, p_k | O)}{\partial \alpha \partial \phi} \\
&= -\sum_{i=1}^n \left[ -H^{-2}(Y_i, D_{ik} | X_i) \left( \sum_{G_{ik} \in (0,1,2)} f(Y_i | X_i, G_{ik}) \frac{Y_i - b'(\eta_i)}{a(\phi)} X_i f(D_{ik} | G_{ik}) f(G_{ik} | p_k) \right) \right. \\
&\quad \cdot \left( \sum_{G_{ik} \in (0,1,2)} f(Y_i | X_i, G_{ik}) \left\{ -\frac{Y_i \eta_i - b(\eta_i)}{a^2(\phi)} a'(\phi) + c'(\phi) \right\} f(D_{ik} | G_{ik}) f(G_{ik} | p_k) \right) \\
&\quad + H^{-1}(Y_i, D_{ik} | X_i) \sum_{G_{ik} \in (0,1,2)} f(Y_i | X_i, G_{ik}) \left\{ \frac{Y_i - b'(\eta_i)}{a(\phi)} X_i \left( -\frac{Y_i \eta_i - b(\eta_i)}{a^2(\phi)} a'(\phi) + c'(\phi) \right) \right. \\
&\quad \left. \left. - \frac{Y_i - b'(\eta_i)}{a^2(\phi)} X_i a'(\phi) \right\} f(D_{ik} | G_{ik}) f(G_{ik} | p_k) \right]
\end{aligned} \tag{13}$$

$$\begin{aligned}
I_{\alpha p_k} &= I_{p_k \alpha} = -\frac{\partial l(\alpha, \beta, \phi, p_k | O)}{\partial \alpha \partial p_k} \\
&= -\sum_{i=1}^n \left[ -H^{-2}(Y_i, D_{ik} | X_i) \left( \sum_{G_{ik} \in (0,1,2)} f(Y_i | X_i, G_{ik}) \frac{Y_i - b'(\eta_i)}{a(\phi)} X_i f(D_{ik} | G_{ik}) f(G_{ik} | p_k) \right) \right. \\
&\quad \cdot \left( \sum_{G_{ik} \in (0,1,2)} f(Y_i | X_i, G_{ik}) f(D_{ik} | G_{ik}) Q(G_{ik}, p_k) \right) \\
&\quad \left. + H^{-1}(Y_i, D_{ik} | X_i) \sum_{G_{ik} \in (0,1,2)} f(Y_i | X_i, G_{ik}) \frac{Y_i - b'(\eta_i)}{a(\phi)} X_i f(D_{ik} | G_{ik}) Q(G_{ik}, p_k) \right]
\end{aligned} \tag{14}$$

$$\begin{aligned}
I_{\beta\beta} &= -\frac{\partial l(\alpha, \beta, \phi, p_k | O)}{\partial \beta \partial \beta} \\
&= -\sum_{i=1}^n \left[ -H^{-2}(Y_i, D_{ik} | X_i) \left( \sum_{G_{ik} \in (0,1,2)} f(Y_i | X_i, G_{ik}) \frac{Y_i - b'(\eta_i)}{a(\phi)} G_{ik} f(D_{ik} | G_{ik}) f(G_{ik} | p_k) \right)^2 \right. \\
&\quad \left. + H^{-1}(Y_i, D_{ik} | X_i) \sum_{G_{ik} \in (0,1,2)} f(Y_i | X_i, G_{ik}) \left( \frac{(Y_i - b'(\eta_i))^2}{a^2(\phi)} - \frac{b''(\eta_i)}{a(\phi)} \right) G_{ik}^2 f(D_{ik} | G_{ik}) f(G_{ik} | p_k) \right]
\end{aligned} \tag{15}$$

$$\begin{aligned}
I_{\beta\phi} &= I_{\phi\beta} = -\frac{\partial l(\alpha, \beta, \phi, p_k|O)}{\partial\beta\partial\phi} \\
&= -\sum_{i=1}^n \left[ -H^{-2}(Y_i, D_{ik}|X_i) \left( \sum_{G_{ik} \in (0,1,2)} f(Y_i|X_i, G_{ik}) \frac{Y_i - b'(\eta_i)}{a(\phi)} G_{ik} f(D_{ik}|G_{ik}) f(G_{ik}|p_k) \right) \right. \\
&\quad \cdot \left( \sum_{G_{ik} \in (0,1,2)} f(Y_i|X_i, G_{ik}) \left\{ -\frac{Y_i\eta_i - b(\eta_i)}{a^2(\phi)} a'(\phi) + c'(\phi) \right\} f(D_{ik}|G_{ik}) f(G_{ik}|p_k) \right) \\
&\quad + H^{-1}(Y_i, D_{ik}|X_i) \sum_{G_{ik} \in (0,1,2)} f(Y_i|X_i, G_{ik}) \left\{ \frac{Y_i - b'(\eta_i)}{a(\phi)} G_{ik} \left( -\frac{Y_i\eta_i - b(\eta_i)}{a^2(\phi)} a'(\phi) + c'(\phi) \right) \right. \\
&\quad \left. \left. - \frac{Y_i - b'(\eta_i)}{a^2(\phi)} G_{ik} a'(\phi) \right\} f(D_{ik}|G_{ik}) f(G_{ik}|p_k) \right]
\end{aligned} \tag{16}$$

$$\begin{aligned}
I_{\beta p_k} &= I_{p_k\beta} = -\frac{\partial l(\alpha, \beta, \phi, p_k|O)}{\partial\beta\partial p_k} \\
&= -\sum_{i=1}^n \left[ -H^{-2}(Y_i, D_{ik}|X_i) \left( \sum_{G_{ik} \in (0,1,2)} f(Y_i|X_i, G_{ik}) \frac{Y_i - b'(\eta_i)}{a(\phi)} G_{ik} f(D_{ik}|G_{ik}) f(G_{ik}|p_k) \right) \right. \\
&\quad \cdot \left( \sum_{G_{ik} \in (0,1,2)} f(Y_i|X_i, G_{ik}) f(D_{ik}|G_{ik}) Q(G_{ik}, p_k) \right) \\
&\quad + H^{-1}(Y_i, D_{ik}|X_i) \sum_{G_{ik} \in (0,1,2)} f(Y_i|X_i, G_{ik}) \frac{Y_i - b'(\eta_i)}{a(\phi)} G_{ik} f(D_{ik}|G_{ik}) Q(G_{ik}, p_k) \left. \right]
\end{aligned} \tag{17}$$

$$\begin{aligned}
I_{\phi\phi} &= -\frac{\partial l(\alpha, \beta, \phi, p_k|O)}{\partial\phi\partial\phi} \\
&= -\sum_{i=1}^n \left[ -H^{-2}(Y_i, D_{ik}|X_i) \left( \sum_{G_{ik} \in (0,1,2)} f(Y_i|X_i, G_{ik}) \left\{ -\frac{Y_i\eta_i - b(\eta_i)}{a^2(\phi)} a'(\phi) + c'(\phi) \right\} f(D_{ik}|G_{ik}) f(G_{ik}|p_k) \right)^2 \right. \\
&\quad + H^{-1}(Y_i, D_{ik}|X_i) \sum_{G_{ik} \in (0,1,2)} f(Y_i|X_i, G_{ik}) \left\{ \left( -\frac{Y_i\eta_i - b(\eta_i)}{a^2(\phi)} a'(\phi) + c'(\phi) \right)^2 \right. \\
&\quad \left. \left. + (Y_i\eta_i - b(\eta_i)) \left( \frac{2a'^2(\phi)}{a^3(\phi)} - \frac{a''(\phi)}{a^2(\phi)} \right) + c''(\phi) \right\} f(D_{ik}|G_{ik}) f(G_{ik}|p_k) \right]
\end{aligned} \tag{18}$$

$$\begin{aligned}
I_{\phi p_k} &= I_{p_k \phi} = -\frac{\partial l(\alpha, \beta, \phi, p_k | O)}{\partial \phi \partial p_k} \\
&= -\sum_{i=1}^n \left[ -H^{-2}(Y_i, D_{ik} | X_i) \left( \sum_{G_{ik} \in (0,1,2)} f(Y_i | X_i, G_{ik}) \left\{ -\frac{Y_i \eta_i - b(\eta_i)}{a^2(\phi)} a'(\phi) + c'(\phi) \right\} f(D_{ik} | G_{ik}) f(G_{ik} | p_k) \right) \right. \\
&\quad \cdot \left( \sum_{G_{ik} \in (0,1,2)} f(Y_i | X_i, G_{ik}) f(D_{ik} | G_{ik}) Q(G_{ik}, p_k) \right) \\
&\quad \left. + H^{-1}(Y_i, D_{ik} | X_i) \sum_{G_{ik} \in (0,1,2)} f(Y_i | X_i, G_{ik}) \left\{ -\frac{Y_i \eta_i - b(\eta_i)}{a^2(\phi)} a'(\phi) + c'(\phi) \right\} f(D_{ik} | G_{ik}) Q(G_{ik}, p_k) \right]
\end{aligned} \tag{19}$$

$$\begin{aligned}
I_{\phi p_k} &= -\frac{\partial l(\alpha, \beta, \phi, p_k | O)}{\partial p_k \partial p_k} \\
&= -\sum_{i=1}^n \left[ -H^{-2}(Y_i, D_{ik} | X_i) \left( \sum_{G_{ik} \in (0,1,2)} f(Y_i | X_i, G_{ik}) f(D_{ik} | G_{ik}) Q(G_{ik}, p_k) \right)^2 \right. \\
&\quad \left. + H^{-1}(Y_i, D_{ik} | X_i) \sum_{G_{ik} \in (0,1,2)} f(Y_i | X_i, G_{ik}) f(D_{ik} | G_{ik}) Q'(G_{ik}, p_k) \right]
\end{aligned} \tag{20}$$

$$\text{where } Q'(G_{ik}, p_k) = \begin{cases} 2, & G_{ik} = 0 \\ -4, & G_{ik} = 1 \\ 2, & G_{ik} = 2 \end{cases}$$

When  $Y_i$  is quantitative,

$$a''(\phi) = 0, b''(\eta) = 1, c''(Y_i, \phi) = -\frac{Y_i^2}{\phi^3} + \frac{1}{2\phi^2} \tag{21}$$

When  $Y_i$  is binary,

$$a''(\phi) = 0, b''(\eta) = \frac{\exp(\eta)(1 + \exp(\eta)) - \exp^2(\eta)}{(1 + \exp(\eta))^2}, c''(Y_i, \phi) = 0 \tag{22}$$

The observed information matrix evaluated at  $(\tilde{\alpha}, 0, \tilde{\phi}, \tilde{p}_k)$  simplifies to

$$I(\tilde{\alpha}, 0, \tilde{\phi}, \tilde{p}_k | O) = \begin{bmatrix} I_{\tilde{\alpha}\tilde{\alpha}} & I_{\tilde{\alpha}0} & 0 & 0 \\ I_{0\tilde{\alpha}} & I_{00} & I_{0\tilde{\phi}} & I_{0\tilde{p}_k} \\ 0 & I_{\tilde{\phi}0} & I_{\tilde{\phi}\tilde{\phi}} & 0 \\ 0 & I_{\tilde{p}_k0} & 0 & I_{\tilde{p}_k\tilde{p}_k} \end{bmatrix} \tag{23}$$

## Appendix C: Prove of inequality (7) in main text

UNC score test statistics is

$$T_{UNC \text{ score}}(Y_i, D_{ik}|X_i) = S^T(\tilde{\alpha}, 0, \tilde{\phi}, \tilde{p}_k)I^{-1}(\tilde{\alpha}, 0, \tilde{\phi}, \tilde{p}_k|O)S(\tilde{\alpha}, 0, \tilde{\phi}, \tilde{p}_k), \quad (24)$$

In Skotte (2012) paper, their test statistics is

$$T_{SKA \text{ score}}(Y_i, D_{ik}|X_i) = S_{Skotte}^T(\tilde{\alpha}, 0, \tilde{\phi})I_{Skotte}^{-1}(\tilde{\alpha}, 0, \tilde{\phi}|O)S_{Skotte}(\tilde{\alpha}, 0, \tilde{\phi}), \quad (25)$$

where

$$S_{Skotte}(\tilde{\alpha}, 0, \tilde{\phi}) = \begin{pmatrix} 0 \\ \sum_{i=1}^n \frac{Y_i - b'(\tilde{\alpha}^T X_i)}{a(\phi)} E(G_{ik}|D_{ik}) \\ 0 \end{pmatrix} \quad (26)$$

and

$$I_{Skotte}(\tilde{\alpha}, 0, \tilde{\phi}|O) = \begin{bmatrix} I_{\tilde{\alpha}\tilde{\alpha}} & I_{\tilde{\alpha}0} & 0 \\ I_{0\tilde{\alpha}} & I_{00} & I_{0\tilde{\phi}} \\ 0 & I_{\tilde{\phi}0} & I_{\tilde{\phi}\tilde{\phi}} \end{bmatrix} \quad (27)$$

$I_{Skotte}(\tilde{\alpha}, 0, \tilde{\phi}|O)$  contains only the first three rows and columns of matrix in (23). By some algebra,

$$\begin{aligned} & T_{UNC \text{ score}}(Y_i, D_{ik}|X_i) \\ &= \left( \sum_{i=1}^n \frac{Y_i - b'(\tilde{\alpha}^T X_i)}{a(\phi)} E(G_{ik}|D_{ik}) \right)^2 \frac{I_{\tilde{\alpha}\tilde{\alpha}}I_{\tilde{\phi}\tilde{\phi}}}{I_{\tilde{\alpha}\tilde{\alpha}}I_{00}I_{\tilde{\phi}\tilde{\phi}} - I_{\tilde{\alpha}\tilde{\alpha}}I_{0\tilde{\phi}}^2 - I_{\tilde{\alpha}0}^2I_{\tilde{\phi}\tilde{\phi}} - I_{\tilde{\alpha}\tilde{\alpha}}I_{0\tilde{p}_k}^2I_{\tilde{\phi}\tilde{\phi}}/I_{\tilde{p}_k\tilde{p}_k}} \end{aligned} \quad (28)$$

and

$$\begin{aligned} & T_{SKA \text{ score}}(Y_i, D_{ik}|X_i) \\ &= \left( \sum_{i=1}^n \frac{Y_i - b'(\tilde{\alpha}^T X_i)}{a(\phi)} E(G_{ik}|D_{ik}) \right)^2 \frac{I_{\tilde{\alpha}\tilde{\alpha}}I_{\tilde{\phi}\tilde{\phi}}}{I_{\tilde{\alpha}\tilde{\alpha}}I_{00}I_{\tilde{\phi}\tilde{\phi}} - I_{\tilde{\alpha}\tilde{\alpha}}I_{0\tilde{\phi}}^2 - I_{\tilde{\alpha}0}^2I_{\tilde{\phi}\tilde{\phi}}} \end{aligned} \quad (29)$$

Obviously,

$$T_{UNC \text{ score}}(Y_i, D_{ik}|X_i) \geq T_{SKA \text{ score}}(Y_i, D_{ik}|X_i) \quad (30)$$

If  $\tilde{\beta}$  and  $\tilde{p}_k$  is independent to each other, then  $I_{\tilde{\beta}\tilde{p}_k} = 0$  and thus  $I_{0\tilde{p}_k}^2 = 0$ . Consequently,

$$T_{UNC \text{ score}}(Y_i, D_{ik}|X_i) = T_{SKA \text{ score}}(Y_i, D_{ik}|X_i) \quad (31)$$

## References

- Skotte, L., T. S. Korneliussen, et al., 2012. Association Testing for Next-Generation Sequencing Data Using Score Statistics. *Genetic Epidemiology*, 36(5), 430–437.
