# Supplementary material
Source: PubMed Central journal article supplement (PMC4668777)

Supplementary Figure 1: Powers of single SNP testing for quantitative trait with  $p_{\text{threshold}} = 0.01$ ,  $\text{MAF} = 0.006$  and  $n = 1000$ .

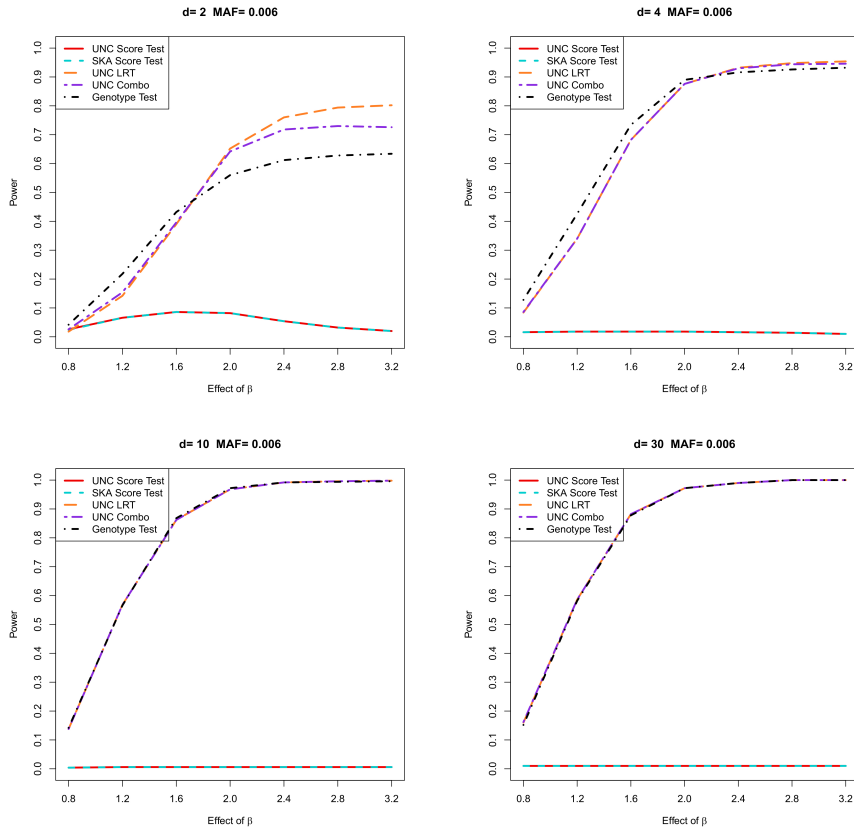

Supplementary Figure 2: Powers of single SNP testing for quantitative trait with  $p_{\text{threshold}} = 0.01$ ,  $\text{MAF} = 0.011$  and  $n = 1000$ .

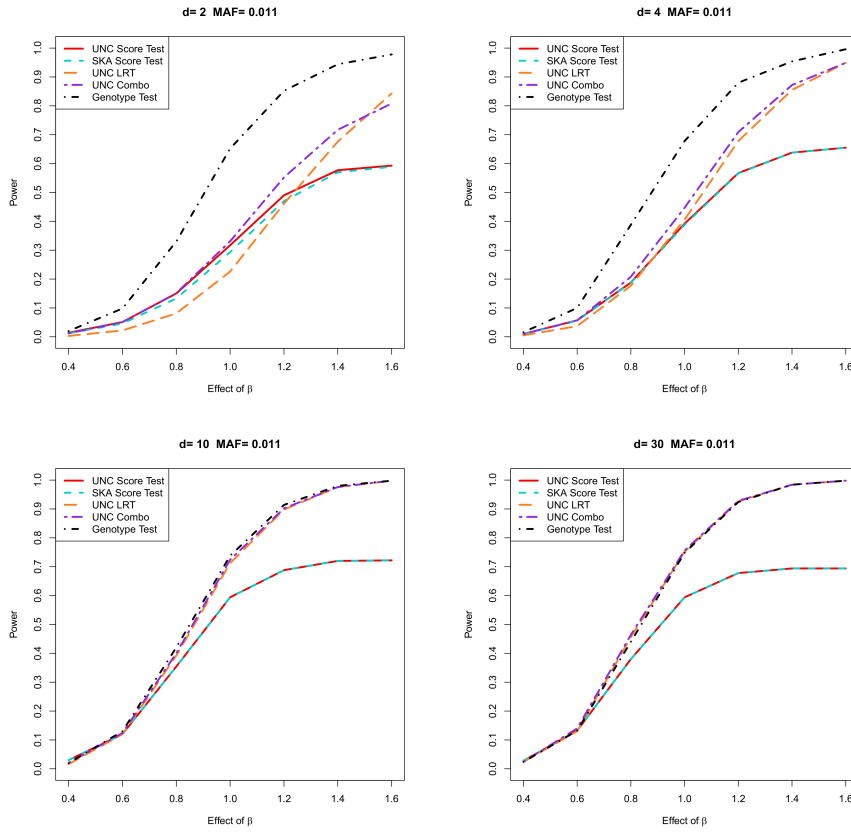

Supplementary Figure 3: Powers of single SNP testing for quantitative trait with  $p_{\text{threshold}} = 0.01$ ,  $\text{MAF} = 0.02$  and  $n = 1000$ .

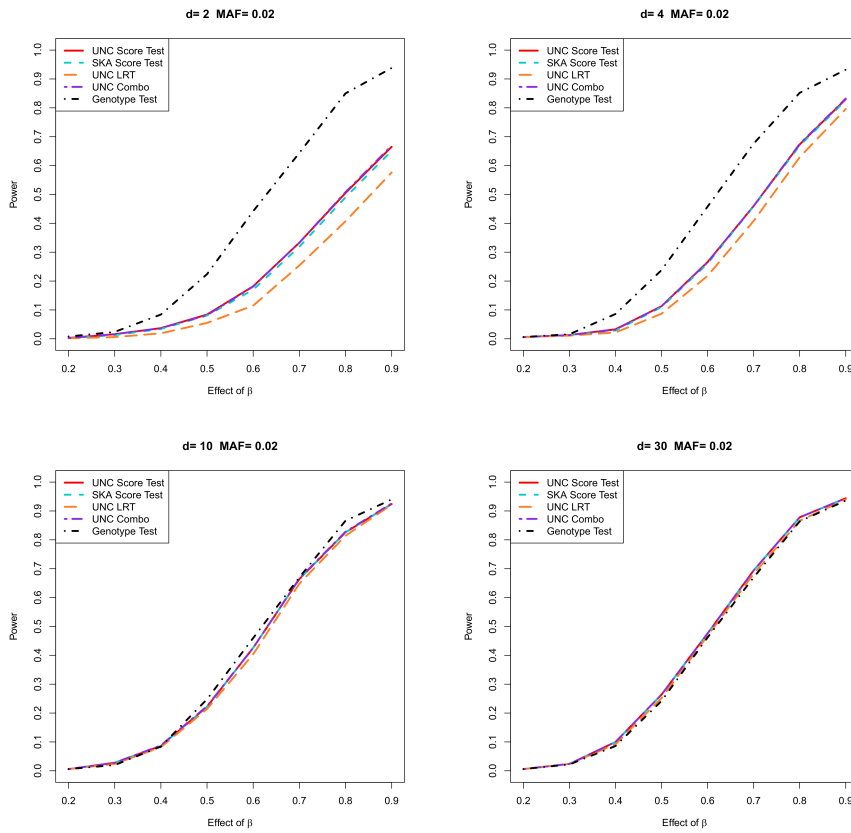

Supplement: supp_btv307_supplementary_figures_1_3.pdf [file supp_btv307_supplementary_figures_1_3.pdf]
