# Supplementary material
Source: PubMed Central journal article supplement (PMC4668777)

Supplementary Figure 7: Powers of multiple testing for quantitative trait with  $p_{\text{threshold}} = 0.01$ ,  $\text{MAF} = 0.011$  and  $n = 1000$ .

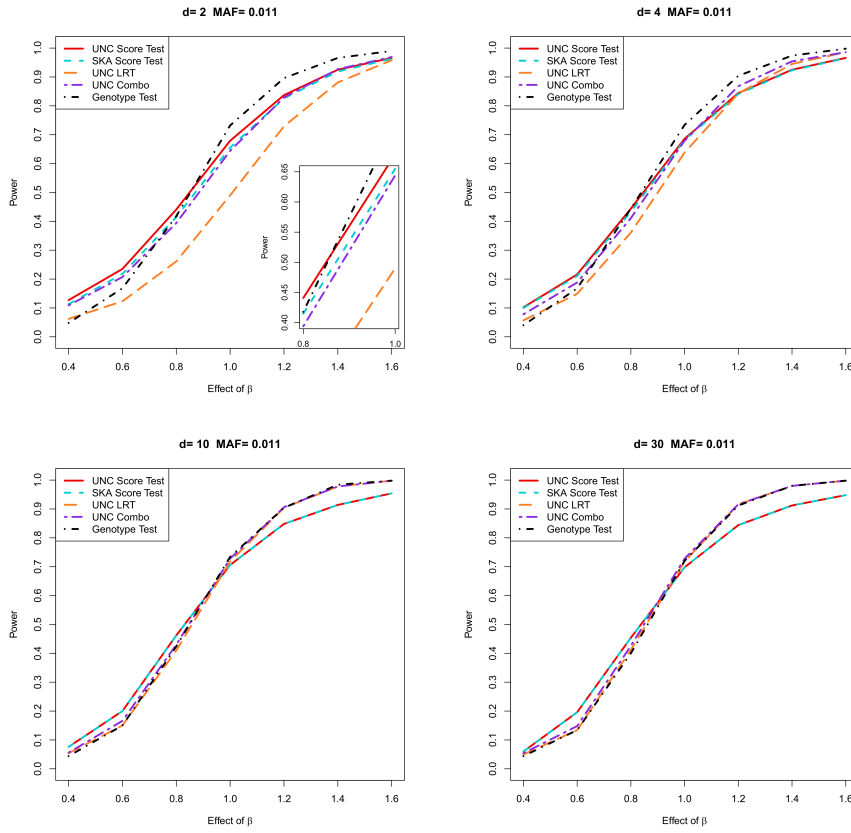

Supplementary Figure 8: Powers of multiple testing for quantitative trait with  $p_{\text{threshold}} = 0.01$ ,  $\text{MAF} = 0.02$  and  $n = 1000$ .

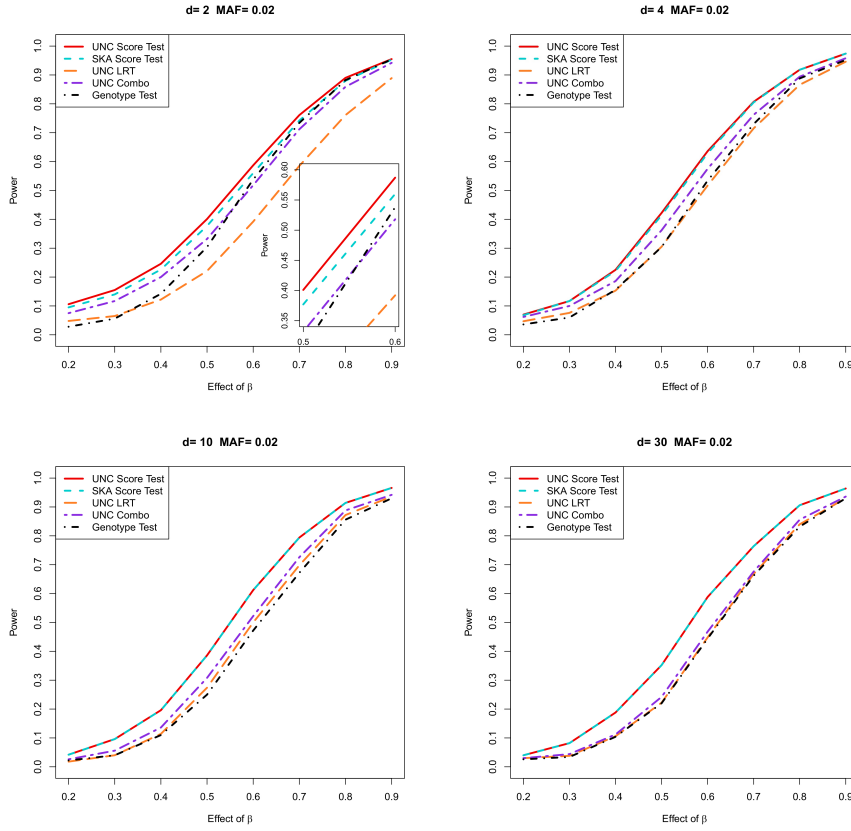

Supplement: supp_btv307_supplementary_figures_7_8.pdf [file supp_btv307_supplementary_figures_7_8.pdf]
