# Supplementary material
Source: PubMed Central journal article supplement (PMC4668777)

Supplementary Figure 9: Powers of multiple testing for binary trait with  $p_{threshold} = 0.01$ ,  $MAF=0.006$  and  $n = 1000$ .

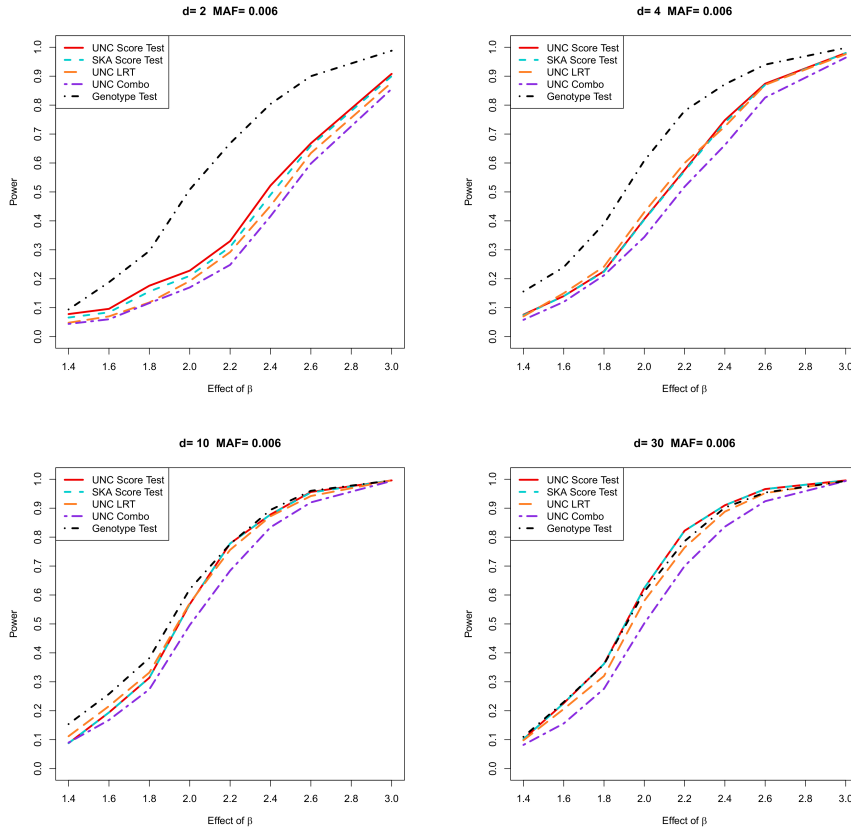

Supplementary Figure 10: Powers of multiple testing for binary trait with  $p_{threshold} = 0.01$ ,  $MAF=0.011$  and  $n = 1000$ .

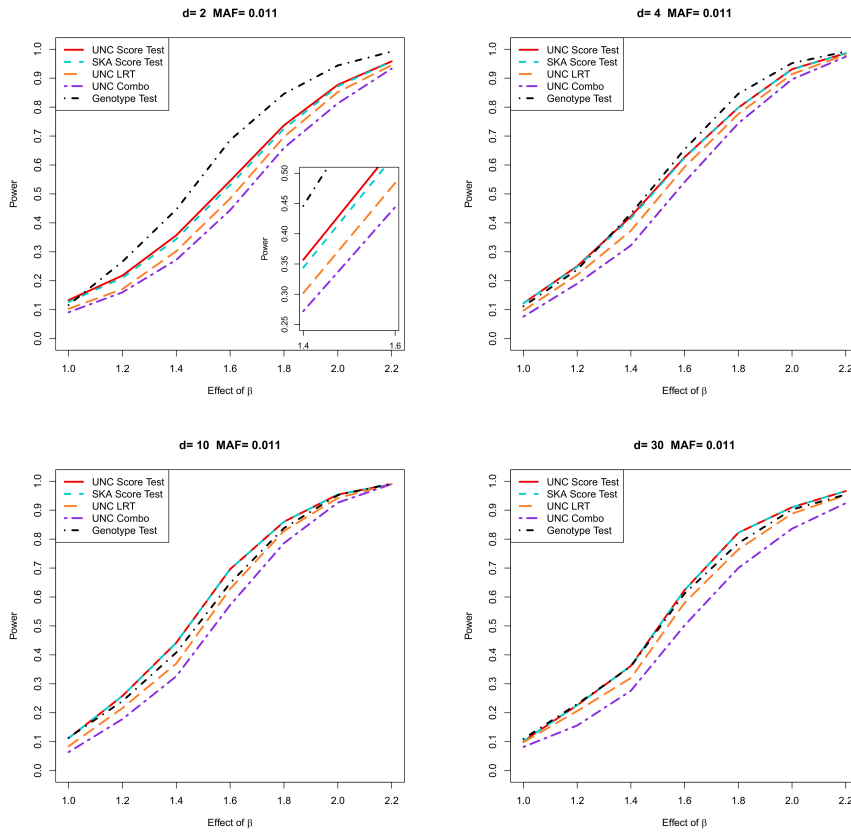

Supplementary Figure 11: Powers of multiple testing for binary trait with  $p_{threshold} = 0.01$ ,  $MAF=0.02$  and  $n = 1000$ .

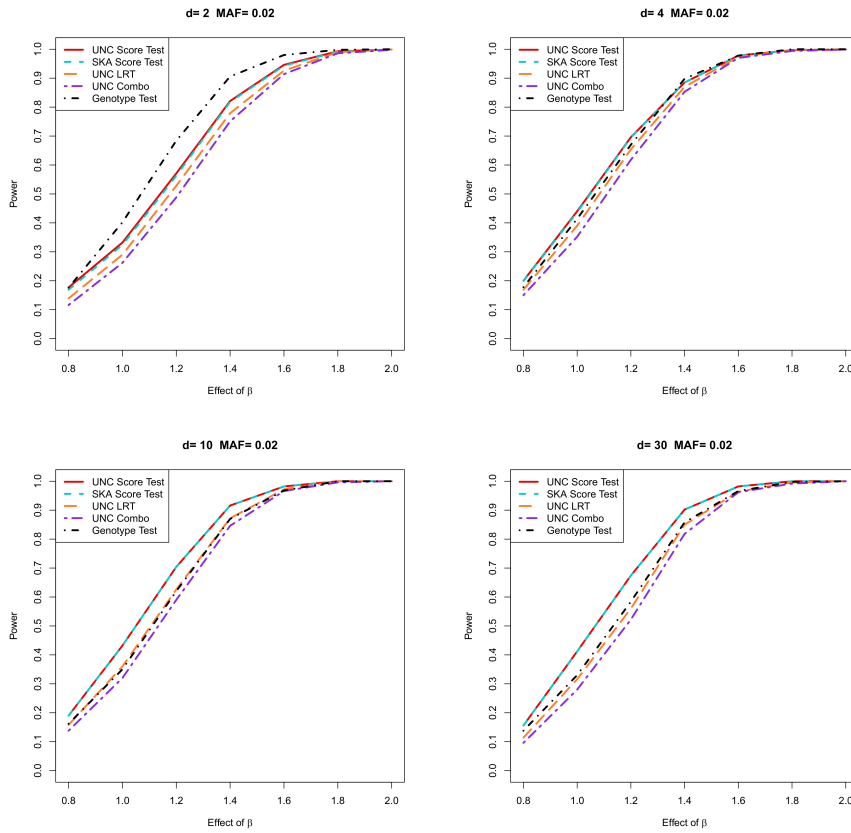

Supplement: supp_btv307_supplementary_figures_9_11.pdf [file supp_btv307_supplementary_figures_9_11.pdf]
